# Supplementary material
Source: PubMed Central journal article supplement (PMC8970574)
Supplement: mmc1.pdf [file mmc1.pdf]

# THE LANCET

## Supplementary appendix

This appendix formed part of the original submission and has been peer reviewed. We post it as supplied by the authors.

Supplement to: Khobragade A, Bhate S, Ramaiah V, et al. Efficacy, safety, and immunogenicity of the DNA SARS-CoV-2 vaccine (ZyCoV-D): the interim efficacy results of a phase 3, randomised, double-blind, placebo-controlled study in India. *Lancet* 2022; **399**: 1313–21.

Table 1: Summary of Treatment Emergent Adverse Events (Age 12-17) (Safety Population)

|                                   | ZyCoV-D<br>(N=447)          |                              |                               | Placebo<br>(N=487)          |                              |                               | Overall<br>(N=934)          |                              |                               |
|-----------------------------------|-----------------------------|------------------------------|-------------------------------|-----------------------------|------------------------------|-------------------------------|-----------------------------|------------------------------|-------------------------------|
|                                   | Dose I<br>(N1=447)<br>n(%)E | Dose II<br>(N1=330)<br>n(%)E | Dose III<br>(N1=210)<br>n(%)E | Dose I<br>(N2=487)<br>n(%)E | Dose II<br>(N2=363)<br>n(%)E | Dose III<br>(N2=248)<br>n(%)E | Dose I<br>(N3=934)<br>n(%)E | Dose II<br>(N3=693)<br>n(%)E | Dose III<br>(N3=458)<br>n(%)E |
| <b>Solicited Adverse Events</b>   |                             |                              |                               |                             |                              |                               |                             |                              |                               |
| Adverse Events                    |                             |                              |                               |                             |                              |                               |                             |                              |                               |
| Subject with any TEAE             | 14 (3.13) 23                | 3 (0.91) 3                   | -                             | 7 (1.44) 16                 | 3 (0.83) 4                   | 2 (0.81) 3                    | 21 (2.25) 39                | 6 (0.87) 7                   | 2 (0.44) 3                    |
| Adverse Event Grade               |                             |                              |                               |                             |                              |                               |                             |                              |                               |
| Mild                              | 14 (100.00) 23              | 3 (100.00) 3                 | -                             | 7 (100.00) 16               | 1 (33.33) 4                  | 2 (100.00) 3                  | 21 (100.00) 39              | 4 (66.67) 7                  | 2 (100.00) 3                  |
| Causality                         |                             |                              |                               |                             |                              |                               |                             |                              |                               |
| Unrelated                         | 1 (7.14) 2                  | -                            | -                             | -                           | -                            | -                             | 1 (4.76) 2                  | -                            | -                             |
| Possibly related                  | -                           | -                            | -                             | 2 (28.57) 2                 | -                            | -                             | 2 (9.52) 2                  | -                            | -                             |
| Probably related                  | -                           | -                            | -                             | -                           | 0 (0.00) 1                   | -                             | -                           | 0 (0.00) 1                   | -                             |
| Definitely related                | 13 (92.86) 21               | 3 (100.00) 3                 | -                             | 5 (71.43) 14                | 1 (33.33) 3                  | 2 (100.00) 3                  | 18 (85.71) 35               | 4 (66.67) 6                  | 2 (100.00) 3                  |
| Action Taken                      |                             |                              |                               |                             |                              |                               |                             |                              |                               |
| None                              | 9 (64.29) 17                | 3 (100.00) 3                 | -                             | 7 (100.00) 16               | 1 (33.33) 4                  | 2 (100.00) 3                  | 16 (76.19) 33               | 4 (66.67) 7                  | 2 (100.00) 3                  |
| Other                             | 5 (35.71) 6                 | -                            | -                             | -                           | -                            | -                             | 5 (23.81) 6                 | -                            | -                             |
| TEAE by outcome                   |                             |                              |                               |                             |                              |                               |                             |                              |                               |
| Recovered /Resolved               | 14 (100.00) 23              | 3 (100.00) 3                 | -                             | 7 (100.00) 16               | 1 (33.33) 4                  | 2 (100.00) 3                  | 21 (100.00) 39              | 4 (66.67) 7                  | 2 (100.00) 3                  |
| <b>Unsolicited Adverse Events</b> |                             |                              |                               |                             |                              |                               |                             |                              |                               |
| Adverse Events                    |                             |                              |                               |                             |                              |                               |                             |                              |                               |
| Subject with any TEAE             | 1 (0.22) 2                  | 1 (0.30) 4                   | -                             | 2 (0.41) 5                  | 1 (0.28) 1                   | 3 (1.21) 6                    | 3 (0.32) 7                  | 2 (0.29) 5                   | 3 (0.66) 6                    |
| Adverse Event Grade               |                             |                              |                               |                             |                              |                               |                             |                              |                               |
| Mild                              | 1 (100.00) 2                | 1 (100.00) 4                 | -                             | 2 (100.00) 5                | 1 (100.00) 1                 | 3 (100.00) 6                  | 3 (100.00) 7                | 2 (100.00) 5                 | 3 (100.00) 6                  |
| Causality                         |                             |                              |                               |                             |                              |                               |                             |                              |                               |
| Unrelated                         | 1 (100.00) 2                | 1 (100.00) 4                 | -                             | 2 (100.00) 5                | 1 (100.00) 1                 | 2 (66.67) 5                   | 3 (100.00) 7                | 2 (100.00) 5                 | 2 (66.67) 5                   |
| Possibly related                  | -                           | -                            | -                             | -                           | -                            | 1 (33.33) 1                   | -                           | -                            | 1 (33.33) 1                   |
| Action Taken                      |                             |                              |                               |                             |                              |                               |                             |                              |                               |
| None                              | 1 (100.00) 2                | 1 (100.00) 4                 | -                             | 2 (100.00) 5                | -                            | 2 (66.67) 5                   | 3 (100.00) 7                | 1 (50.00) 4                  | 2 (66.67) 5                   |
| Drug Withdrawn                    | -                           | -                            | -                             | -                           | 1 (100.00) 1                 | -                             | -                           | 1 (50.00) 1                  | -                             |
| Other                             | -                           | -                            | -                             | -                           | -                            | 1 (33.33) 1                   | -                           | -                            | 1 (33.33) 1                   |
| TEAE by outcome                   |                             |                              |                               |                             |                              |                               |                             |                              |                               |
| Recovered /Resolved               | 1 (100.00) 2                | 1 (100.00) 4                 | -                             | 2 (100.00) 5                | 1 (100.00) 1                 | 3 (100.00) 6                  | 3 (100.00) 7                | 2 (100.00) 5                 | 3 (100.00) 6                  |

-TEAE = treatment-emergent adverse event; N = number of Subjects at risk; E = number of TEAE.  
-TEAE are those adverse events which occurred after first dose of study medication.  
-N1=Number of Subject at dose Dose I . N2=Number of Subject at dose Dose II .N3=Number of Subject at dose Dose III .

-Percentages for the 'Subject with any AE' and 'Subject with any serious AE' rows are based on the total number of subjects as per Dose  
-Percentages for the Adverse event grade, Causality, Action Taken and outcome rows are based on the total number of subjects with any TEAE  
-n's in the Adverse event grade, Causality, Action Taken and outcome rows is based on the total number of Subjects With any TEAE.

Table 2: Summary of Treatment Emergent Adverse Events (Age>60 years) (Safety Population)

|                                 | ZyCoV-D<br>(N=924)          |                              |                               | Placebo<br>(N=923)          |                              |                               | Overall<br>(N=1847)          |                               |                                |
|---------------------------------|-----------------------------|------------------------------|-------------------------------|-----------------------------|------------------------------|-------------------------------|------------------------------|-------------------------------|--------------------------------|
|                                 | Dose I<br>(N1=924)<br>n(%)E | Dose II<br>(N1=885)<br>n(%)E | Dose III<br>(N1=869)<br>n(%)E | Dose I<br>(N2=923)<br>n(%)E | Dose II<br>(N2=878)<br>n(%)E | Dose III<br>(N2=863)<br>n(%)E | Dose I<br>(N3=1847)<br>n(%)E | Dose II<br>(N3=1763)<br>n(%)E | Dose III<br>(N3=1732)<br>n(%)E |
| <b>Solicited Adverse Events</b> |                             |                              |                               |                             |                              |                               |                              |                               |                                |
| Adverse Events                  |                             |                              |                               |                             |                              |                               |                              |                               |                                |
| Subject with any TEAE           | 7 (0.76) 11                 | 10 (1.13) 11                 | 14 (1.61) 14                  | 18 (1.95) 24                | 13 (1.48) 13                 | 10 (1.16) 10                  | 25 (1.35) 35                 | 23 (1.30) 24                  | 24 (1.39) 24                   |
| Adverse Event Grade             |                             |                              |                               |                             |                              |                               |                              |                               |                                |
| Mild                            | 7 (100.00)<br>11            | 7 (70.00) 9                  | 12 (85.71) 12                 | 17 (94.44)<br>24            | 9 (69.23)<br>11              | 10 (100.00)<br>10             | 24 (96.00)<br>35             | 16 (69.57)<br>20              | 22 (91.67) 22                  |
| Moderate                        | -                           | 1 (10.00) 2                  | 2 (14.29) 2                   | -                           | 1 (7.69) 2                   | -                             | -                            | 2 (8.70) 4                    | 2 (8.33) 2                     |
| <b>Causality</b>                |                             |                              |                               |                             |                              |                               |                              |                               |                                |
| Unrelated                       | -                           | -                            | 1 (7.14) 1                    | -                           | -                            | 1 (10.00) 1                   | -                            | -                             | 2 (8.33) 2                     |
| Possibly related                | 3 (42.86) 5                 | 1 (10.00) 1                  | 1 (7.14) 1                    | 4 (22.22) 7                 | 4 (30.77) 4                  | 1 (10.00) 1                   | 7 (28.00) 12                 | 5 (21.74) 5                   | 2 (8.33) 2                     |
| Probably related                | 2 (28.57) 4                 | 6 (60.00) 8                  | 9 (64.29) 9                   | 3 (16.67) 7                 | 2 (15.38) 4                  | 4 (40.00) 4                   | 5 (20.00) 11                 | 8 (34.78) 12                  | 13 (54.17) 13                  |
| Definitely related              | 2 (28.57) 2                 | -                            | -                             | 10 (55.56)<br>10            | 2 (15.38) 2                  | 2 (20.00) 2                   | 12 (48.00)<br>12             | 2 (8.70) 2                    | 2 (8.33) 2                     |
| Unknown                         | -                           | 1 (10.00) 2                  | 3 (21.43) 3                   | -                           | 2 (15.38) 3                  | 2 (20.00) 2                   | -                            | 3 (13.04) 5                   | 5 (20.83) 5                    |
| Action Taken                    |                             |                              |                               |                             |                              |                               |                              |                               |                                |
| None                            | 6 (85.71) 10                | 7 (70.00)<br>10              | 13 (92.86) 13                 | 17 (94.44)<br>24            | 9 (69.23)<br>12              | 9 (90.00) 9                   | 23 (92.00)<br>34             | 16 (69.57)<br>22              | 22 (91.67) 22                  |
| Non-drug treatment required     | 1 (14.29) 1                 | -                            | -                             | -                           | -                            | -                             | 1 (4.00) 1                   | -                             | -                              |
| Other                           | -                           | 1 (10.00) 1                  | 1 (7.14) 1                    | -                           | 1 (7.69) 1                   | 1 (10.00) 1                   | -                            | 2 (8.70) 2                    | 2 (8.33) 2                     |
| TEAE by outcome                 |                             |                              |                               |                             |                              |                               |                              |                               |                                |

|                                           |                  |                 |                   |                  |                  |                   |                  |                  |                   |
|-------------------------------------------|------------------|-----------------|-------------------|------------------|------------------|-------------------|------------------|------------------|-------------------|
| Recovered /Resolved                       | 7 (100.00)<br>11 | 8 (80.00)<br>11 | 14 (100.00)<br>14 | 16 (88.89)<br>22 | 10 (76.92)<br>13 | 10 (100.00)<br>10 | 23 (92.00)<br>33 | 18 (78.26)<br>24 | 24 (100.00)<br>24 |
| Recovered/Resolved with Sequelae          | -                | -               | -                 | 1 (5.56) 2       | -                | -                 | 1 (4.00) 2       | -                | -                 |
| <b>Unsolicited Adverse Events</b>         |                  |                 |                   |                  |                  |                   |                  |                  |                   |
| Adverse Events                            |                  |                 |                   |                  |                  |                   |                  |                  |                   |
| Subject with any TEAE                     | 1 (0.11) 1       | 1 (0.11) 3      | 15 (1.73) 29      | 3 (0.33) 8       | -                | 16 (1.85) 22      | 4 (0.22) 9       | 1 (0.06) 3       | 31 (1.79) 51      |
| Subject with any serious TEAE             | -                | -               | 1 (0.12) 1        | -                | -                | -                 | -                | -                | 1 (0.06) 1        |
| Adverse Event Grade                       |                  |                 |                   |                  |                  |                   |                  |                  |                   |
| Mild                                      | 1 (100.00)<br>1  | 1 (100.00)<br>3 | 14 (93.33) 23     | 3 (100.00)<br>8  | -                | 15 (93.75) 20     | 4 (100.00)<br>9  | 1 (100.00)<br>3  | 29 (93.55) 43     |
| Moderate                                  | -                | -               | 1 (6.67) 6        | -                | -                | 1 (6.25) 2        | -                | -                | 2 (6.45) 8        |
| Causality                                 |                  |                 |                   |                  |                  |                   |                  |                  |                   |
| Unrelated                                 | 1 (100.00)<br>1  | 1 (100.00)<br>3 | 8 (53.33) 21      | 3 (100.00)<br>8  | -                | 11 (68.75) 17     | 4 (100.00)<br>9  | 1 (100.00)<br>3  | 19 (61.29) 38     |
| Possibly related                          | -                | -               | 5 (33.33) 5       | -                | -                | 5 (31.25) 5       | -                | -                | 10 (32.26) 10     |
| Definitely related                        | -                | -               | 1 (6.67) 2        | -                | -                | -                 | -                | -                | 1 (3.23) 2        |
| Unknown                                   | -                | -               | 1 (6.67) 1        | -                | -                | -                 | -                | -                | 1 (3.23) 1        |
| Action Taken                              |                  |                 |                   |                  |                  |                   |                  |                  |                   |
| None                                      | 1 (100.00)<br>1  | 1 (100.00)<br>3 | 10 (66.67) 19     | 3 (100.00)<br>8  | -                | 11 (68.75) 17     | 4 (100.00)<br>9  | 1 (100.00)<br>3  | 21 (67.74) 36     |
| Non-drug treatment required               | -                | -               | 3 (20.00) 7       | -                | -                | 2 (12.50) 2       | -                | -                | 5 (16.13) 9       |
| Hospitalization/prolonged hospitalization | -                | -               | 0 (0.00) 1        | -                | -                | -                 | -                | -                | 0 (0.00) 1        |
| Other                                     | -                | -               | 2 (13.33) 2       | -                | -                | 3 (18.75) 3       | -                | -                | 5 (16.13) 5       |
| TEAE by outcome                           |                  |                 |                   |                  |                  |                   |                  |                  |                   |
| Recovered /Resolved                       | -                | 1 (100.00)<br>3 | 15 (100.00)<br>29 | 3 (100.00)<br>8  | -                | 15 (93.75) 21     | 3 (75.00) 8      | 1 (100.00)<br>3  | 30 (96.77) 50     |

|                                  |                 |   |   |   |   |            |             |   |            |
|----------------------------------|-----------------|---|---|---|---|------------|-------------|---|------------|
| Recovered/Resolved with Sequelae | 1 (100.00)<br>1 | - | - | - | - | 1 (6.25) 1 | 1 (25.00) 1 | - | 1 (3.23) 1 |
|----------------------------------|-----------------|---|---|---|---|------------|-------------|---|------------|

-TEAE = treatment-emergent adverse event; N = number of Subjects at risk; E = number of TEAE.  
-TEAE are those adverse events which occurred after first dose of study medication.  
-N1=Number of Subject at dose Dose I . N2=Number of Subject at dose Dose II .N3=Number of Subject at dose Dose III .  
-Percentages for the 'Subject with any AE' and 'Subject with any serious AE' rows are based on the total number of subjects as per Dose  
-Percentages for the Adverse event grade, Causality, Action Taken and outcome rows are based on the total number of subjects with any TEAE  
-n's in the Adverse event grade, Causality, Action Taken and outcome rows is based on the total number of Subjects With any TEAE.

Table 3 Summary of Treatment Emergent Adverse Events (Comorbid subjects) (Safety Population)

|                                 | ZyCoV-D<br>(N=709)          |                              |                               | Placebo<br>(N=740)          |                              |                               | Overall<br>(N=1449)          |                               |                                |
|---------------------------------|-----------------------------|------------------------------|-------------------------------|-----------------------------|------------------------------|-------------------------------|------------------------------|-------------------------------|--------------------------------|
|                                 | Dose I<br>(N1=709)<br>n(%)E | Dose II<br>(N1=688)<br>n(%)E | Dose III<br>(N1=658)<br>n(%)E | Dose I<br>(N2=740)<br>n(%)E | Dose II<br>(N2=713)<br>n(%)E | Dose III<br>(N2=684)<br>n(%)E | Dose I<br>(N3=1449)<br>n(%)E | Dose II<br>(N3=1401)<br>n(%)E | Dose III<br>(N3=1342)<br>n(%)E |
| <b>Solicited Adverse Events</b> |                             |                              |                               |                             |                              |                               |                              |                               |                                |
| Adverse Events                  |                             |                              |                               |                             |                              |                               |                              |                               |                                |
| Subject with any TEAE           | 11 (1.55) 20                | 3 (0.44) 3                   | 8 (1.22) 9                    | 22 (2.97) 50                | 11 (1.54) 13                 | 7 (1.02) 7                    | 33 (2.28) 70                 | 14 (1.00) 16                  | 15 (1.12) 16                   |
| Adverse Event Grade             |                             |                              |                               |                             |                              |                               |                              |                               |                                |
| Mild                            | 10 (90.91) 19               | 2 (66.67) 2                  | 8 (100.00) 9                  | 17 (77.27) 49               | 9 (81.82) 11                 | 7 (100.00) 7                  | 27 (81.82) 68                | 11 (78.57) 13                 | 15 (100.00) 16                 |
| Moderate                        | 1 (9.09) 1                  | 1 (33.33) 1                  | -                             | 1 (4.55) 1                  | 1 (9.09) 2                   | -                             | 2 (6.06) 2                   | 2 (14.29) 3                   | -                              |
| Causality                       |                             |                              |                               |                             |                              |                               |                              |                               |                                |
| Unrelated                       | -                           | -                            | 1 (12.50) 1                   | -                           | -                            | 3 (42.86) 3                   | -                            | -                             | 4 (26.67) 4                    |
| Possibly related                | 5 (45.45) 8                 | 1 (33.33) 1                  | 2 (25.00) 2                   | 5 (22.73) 11                | 6 (54.55) 7                  | 1 (14.29) 1                   | 10 (30.30) 19                | 7 (50.00) 8                   | 3 (20.00) 3                    |
| Probably related                | 4 (36.36) 10                | -                            | 3 (37.50) 4                   | 8 (36.36) 32                | -                            | 1 (14.29) 1                   | 12 (36.36) 42                | -                             | 4 (26.67) 5                    |
| Definitely related              | 2 (18.18) 2                 | 1 (33.33) 1                  | 2 (25.00) 2                   | 5 (22.73) 7                 | 2 (18.18) 2                  | 1 (14.29) 1                   | 7 (21.21) 9                  | 3 (21.43) 3                   | 3 (20.00) 3                    |
| Unknown                         | -                           | 1 (33.33) 1                  | -                             | -                           | 2 (18.18) 4                  | 1 (14.29) 1                   | -                            | 3 (21.43) 5                   | 1 (6.67) 1                     |
| Action Taken                    |                             |                              |                               |                             |                              |                               |                              |                               |                                |

|                                          | ZyCoV-D<br>(N=709)          |                              |                               | Placebo<br>(N=740)          |                              |                               | Overall<br>(N=1449)          |                               |                                |
|------------------------------------------|-----------------------------|------------------------------|-------------------------------|-----------------------------|------------------------------|-------------------------------|------------------------------|-------------------------------|--------------------------------|
|                                          | Dose I<br>(N1=709)<br>n(%)E | Dose II<br>(N1=688)<br>n(%)E | Dose III<br>(N1=658)<br>n(%)E | Dose I<br>(N2=740)<br>n(%)E | Dose II<br>(N2=713)<br>n(%)E | Dose III<br>(N2=684)<br>n(%)E | Dose I<br>(N3=1449)<br>n(%)E | Dose II<br>(N3=1401)<br>n(%)E | Dose III<br>(N3=1342)<br>n(%)E |
| None                                     | 10 (90.91) 19               | 3 (100.00) 3                 | 6 (75.00) 7                   | 16 (72.73) 48               | 7 (63.64) 8                  | 6 (85.71) 6                   | 26 (78.79) 67                | 10 (71.43) 11                 | 12 (80.00) 13                  |
| Non-drug treatment required              | -                           | -                            | 1 (12.50) 1                   | 1 (4.55) 1                  | -                            | -                             | 1 (3.03) 1                   | -                             | 1 (6.67) 1                     |
| Diagnostic or clinical test(s) conducted | -                           | -                            | -                             | -                           | 1 (9.09) 2                   | -                             | -                            | 1 (7.14) 2                    | -                              |
| Other                                    | 1 (9.09) 1                  | -                            | 1 (12.50) 1                   | 1 (4.55) 1                  | 2 (18.18) 3                  | 1 (14.29) 1                   | 2 (6.06) 2                   | 2 (14.29) 3                   | 2 (13.33) 2                    |
| TEAE by outcome                          |                             |                              |                               |                             |                              |                               |                              |                               |                                |
| Recovered /Resolved                      | 11 (100.00) 20              | 3 (100.00) 3                 | 8 (100.00) 9                  | 17 (77.27) 48               | 10 (90.91) 13                | 6 (85.71) 6                   | 28 (84.85) 68                | 13 (92.86) 16                 | 14 (93.33) 15                  |
| Recovered/Resolved with Sequelae         | -                           | -                            | -                             | 1 (4.55) 2                  | -                            | 1 (14.29) 1                   | 1 (3.03) 2                   | -                             | 1 (6.67) 1                     |
| <b>Unsolicited Adverse Events</b>        |                             |                              |                               |                             |                              |                               |                              |                               |                                |
| Adverse Events                           |                             |                              |                               |                             |                              |                               |                              |                               |                                |
| Subject with any TEAE                    | 2 (0.28) 4                  | 6 (0.87) 18                  | 20 (3.04) 39                  | 3 (0.41) 8                  | 3 (0.42) 6                   | 21 (3.07) 38                  | 5 (0.35) 12                  | 9 (0.64) 24                   | 41 (3.06) 77                   |
| Subject with any serious TEAE            | -                           | -                            | 1 (0.15) 1                    | 1 (0.14) 1                  | -                            | 1 (0.15) 1                    | 1 (0.07) 1                   | -                             | 2 (0.15) 2                     |
| Adverse Event Grade                      |                             |                              |                               |                             |                              |                               |                              |                               |                                |
| Mild                                     | 1 (50.00) 4                 | 1 (16.67) 18                 | 14 (70.00) 30                 | 3 (100.00) 6                | 0 (0.00) 6                   | 15 (71.43) 35                 | 4 (80.00) 10                 | 1 (11.11) 24                  | 29 (70.73) 65                  |
| Moderate                                 | -                           | -                            | 1 (5.00) 9                    | 0 (0.00) 2                  | -                            | 1 (4.76) 3                    | 0 (0.00) 2                   | -                             | 2 (4.88) 12                    |
| Causality                                |                             |                              |                               |                             |                              |                               |                              |                               |                                |
| Unrelated                                | 2 (100.00) 1                | 6 (100.00) 3                 | 9 (45.00) 21                  | 3 (100.00) 8                | 2 (66.67) 0                  | 11 (52.38) 17                 | 5 (100.00) 9                 | 8 (88.89) 3                   | 20 (48.78) 38                  |
| Possibly related                         | -                           | -                            | 6 (30.00) 5                   | -                           | -                            | 8 (38.10) 5                   | -                            | -                             | 14 (34.15) 10                  |

|                                           | ZyCoV-D<br>(N=709)          |                              |                               | Placebo<br>(N=740)          |                              |                               | Overall<br>(N=1449)          |                               |                                |
|-------------------------------------------|-----------------------------|------------------------------|-------------------------------|-----------------------------|------------------------------|-------------------------------|------------------------------|-------------------------------|--------------------------------|
|                                           | Dose I<br>(N1=709)<br>n(%)E | Dose II<br>(N1=688)<br>n(%)E | Dose III<br>(N1=658)<br>n(%)E | Dose I<br>(N2=740)<br>n(%)E | Dose II<br>(N2=713)<br>n(%)E | Dose III<br>(N2=684)<br>n(%)E | Dose I<br>(N3=1449)<br>n(%)E | Dose II<br>(N3=1401)<br>n(%)E | Dose III<br>(N3=1342)<br>n(%)E |
| Probably related                          | -                           | -                            | 1 (5.00) 0                    | -                           | -                            | -                             | -                            | -                             | 1 (2.44) 0                     |
| Definitely related                        | -                           | -                            | 2 (10.00) 2                   | -                           | -                            | -                             | -                            | -                             | 2 (4.88) 2                     |
| Unknown                                   | -                           | -                            | 2 (10.00) 1                   | -                           | 1 (33.33) 0                  | 2 (9.52) 0                    | -                            | 1 (11.11) 0                   | 4 (9.76) 1                     |
| Action Taken                              |                             |                              |                               |                             |                              |                               |                              |                               |                                |
| None                                      | 1 (50.00) 2                 | 4 (66.67) 13                 | 13 (65.00) 22                 | 2 (66.67) 4                 | 1 (33.33) 1                  | 15 (71.43) 21                 | 3 (60.00) 6                  | 5 (55.56) 14                  | 28 (68.29) 43                  |
| Non-drug treatment required               | -                           | 1 (16.67) 2                  | 2 (10.00) 7                   | -                           | -                            | 2 (9.52) 7                    | -                            | 1 (11.11) 2                   | 4 (9.76) 14                    |
| Hospitalization/prolonged hospitalization | -                           | -                            | 1 (5.00) 5                    | 0 (0.00) 1                  | -                            | 0 (0.00) 1                    | 0 (0.00) 1                   | -                             | 1 (2.44) 6                     |
| Diagnostic or clinical test(s) conducted  | -                           | -                            | 1 (5.00) 2                    | -                           | 1 (33.33) 2                  | -                             | -                            | 1 (11.11) 2                   | 1 (2.44) 2                     |
| Drug Withdrawn                            | 1 (50.00) 2                 | 1 (16.67) 3                  | -                             | 1 (33.33) 3                 | 1 (33.33) 3                  | -                             | 2 (40.00) 5                  | 2 (22.22) 6                   | -                              |
| Other                                     | -                           | -                            | 3 (15.00) 3                   | -                           | -                            | 4 (19.05) 9                   | -                            | -                             | 7 (17.07) 12                   |
| TEAE by outcome                           |                             |                              |                               |                             |                              |                               |                              |                               |                                |
| Recovered /Resolved                       | 2 (100.00) 4                | 6 (100.00) 18                | 20 (100.00) 39                | 3 (100.00) 8                | 3 (100.00) 6                 | 21 (100.00) 38                | 5 (100.00) 12                | 9 (100.00) 24                 | 41 (100.00) 77                 |

-TEAE = treatment-emergent adverse event; N = number of Subjects at risk; E = number of TEAE..  
-TEAE are those adverse events which occurred after first dose of study medication.  
-N1=Number of Subject at dose Dose I . N2=Number of Subject at dose Dose II .N3=Number of Subject at dose Dose III .  
-Percentages for the 'Subject with any AE' and 'Subject with any serious AE' rows are based on the total number of subjects as per Dose  
-Percentages for the Adverse event grade, Causality, Action Taken and outcome rows are based on the total number of subjects with any TEAE  
-n's in the Adverse event grade, Causality, Action Taken and outcome rows is based on the total number of Subjects With any TEAE.

Table 4 Summary of Treatment Emergent Adverse Events by System Organ Class and Preferred Term (Age 12-17 years, Safety Population)



|                                                      | ZyCoV-D<br>(N=447)          |                          |                               | Placebo<br>(N=487)          |                              |                               | Overall<br>(N=934)          |                              |                               |
|------------------------------------------------------|-----------------------------|--------------------------|-------------------------------|-----------------------------|------------------------------|-------------------------------|-----------------------------|------------------------------|-------------------------------|
|                                                      | Dose I<br>(N1=447)<br>n(%)E | Dose II<br>(N1=330)n(%)E | Dose III<br>(N1=210)<br>n(%)E | Dose I<br>(N2=487)<br>n(%)E | Dose II<br>(N2=363)<br>n(%)E | Dose III<br>(N2=248)<br>n(%)E | Dose I<br>(N3=934)<br>n(%)E | Dose II<br>(N3=693)<br>n(%)E | Dose III<br>(N3=458)<br>n(%)E |
| <b>Solicited Adverse Events</b>                      |                             |                          |                               |                             |                              |                               |                             |                              |                               |
| Subject with any TEAE related to the IP              | 14 (3.13) 23                | 3 (0.91) 3               | -                             | 7 (1.44) 16                 | 3 (0.83) 4                   | 2 (0.81) 3                    | 21 (2.25) 39                | 6 (0.87) 7                   | 2 (0.44) 3                    |
| General disorders and administration site conditions | 11 (78.57) 15               | 1 (33.33) 1              | -                             | 6 (85.71) 7                 | 2 (66.67) 2                  | 2 (100.00) 2                  | 17 (80.95) 22               | 3 (50.00) 3                  | 2 (100.00) 2                  |
| Fatigue                                              | 1 (7.14) 1                  | -                        | -                             | 2 (28.57) 2                 | -                            | -                             | 3 (14.29) 3                 | -                            | -                             |
| Injection site pain                                  | 10 (71.43) 11               | 1 (33.33) 1              | -                             | 5 (71.43) 5                 | 1 (33.33) 1                  | 2 (100.00) 2                  | 15 (71.43) 16               | 2 (33.33) 2                  | 2 (100.00) 2                  |
| Pyrexia                                              | 2 (14.29) 2                 | -                        | -                             | -                           | -                            | -                             | 2 (9.52) 2                  | -                            | -                             |
| Swelling                                             | 1 (7.14) 1                  | -                        | -                             | -                           | 1 (33.33) 1                  | -                             | 1 (4.76) 1                  | 1 (16.67) 1                  | -                             |
| Musculoskeletal and connective tissue disorders      | -                           | -                        | -                             | 2 (28.57) 4                 | -                            | -                             | 2 (9.52) 4                  | -                            | -                             |
| Arthralgia                                           | -                           | -                        | -                             | 2 (28.57) 2                 | -                            | -                             | 2 (9.52) 2                  | -                            | -                             |
| Myalgia                                              | -                           | -                        | -                             | 2 (28.57) 2                 | -                            | -                             | 2 (9.52) 2                  | -                            | -                             |
| Nervous system disorders                             | 3 (21.43) 3                 | -                        | -                             | 1 (14.29) 1                 | 1 (33.33) 1                  | -                             | 4 (19.05) 4                 | 1 (16.67) 1                  | -                             |
| Headache                                             | 3 (21.43) 3                 | -                        | -                             | 1 (14.29) 1                 | 1 (33.33) 1                  | -                             | 4 (19.05) 4                 | 1 (16.67) 1                  | -                             |
| Skin and subcutaneous tissue disorders               | 4 (28.57) 5                 | 2 (66.67) 2              | -                             | 1 (14.29) 2                 | 1 (33.33) 1                  | 1 (50.00) 1                   | 5 (23.81) 7                 | 3 (50.00) 3                  | 1 (50.00) 1                   |
| Erythema                                             | 2 (14.29) 2                 | 2 (66.67) 2              | -                             | -                           | 1 (33.33) 1                  | 1 (50.00) 1                   | 2 (9.52) 2                  | 3 (50.00) 3                  | 1 (50.00) 1                   |
| Pruritus                                             | 2 (14.29) 3                 | -                        | -                             | 1 (14.29) 2                 | -                            | -                             | 3 (14.29) 5                 | -                            | -                             |
| <b>Unsolicited Adverse Events</b>                    |                             |                          |                               |                             |                              |                               |                             |                              |                               |
| Subject with any TEAE related to the IP              | 1 (0.22) 2                  | 1 (0.30) 4               | -                             | 2 (0.41) 5                  | 1 (0.28) 1                   | 3 (1.21) 6                    | 3 (0.32) 7                  | 2 (0.29) 5                   | 3 (0.66) 6                    |

|                                                      | ZyCoV-D<br>(N=447)          |                          |                               | Placebo<br>(N=487)          |                              |                               | Overall<br>(N=934)          |                              |                               |
|------------------------------------------------------|-----------------------------|--------------------------|-------------------------------|-----------------------------|------------------------------|-------------------------------|-----------------------------|------------------------------|-------------------------------|
|                                                      | Dose I<br>(N1=447)<br>n(%)E | Dose II<br>(N1=330)n(%)E | Dose III<br>(N1=210)<br>n(%)E | Dose I<br>(N2=487)<br>n(%)E | Dose II<br>(N2=363)<br>n(%)E | Dose III<br>(N2=248)<br>n(%)E | Dose I<br>(N3=934)<br>n(%)E | Dose II<br>(N3=693)<br>n(%)E | Dose III<br>(N3=458)<br>n(%)E |
| Gastrointestinal disorders                           | -                           | -                        | -                             | -                           | -                            | 1 (33.33) 1                   | -                           | -                            | 1 (33.33) 1                   |
| Mouth ulceration                                     | -                           | -                        | -                             | -                           | -                            | 1 (33.33) 1                   | -                           | -                            | 1 (33.33) 1                   |
| General disorders and administration site conditions | 1 (100.00) 1                | 1 (100.00) 2             | -                             | 1 (50.00) 2                 | 1 (100.00) 1                 | 1 (33.33) 2                   | 2 (66.67) 3                 | 2 (100.00) 3                 | 1 (33.33) 2                   |
| Asthenia                                             | -                           | 1 (100.00) 1             | -                             | -                           | -                            | -                             | -                           | 1 (50.00) 1                  | -                             |
| Pain                                                 | -                           | -                        | -                             | 1 (50.00) 1                 | -                            | 1 (33.33) 1                   | 1 (33.33) 1                 | -                            | 1 (33.33) 1                   |
| Pyrexia                                              | 1 (100.00) 1                | 1 (100.00) 1             | -                             | 1 (50.00) 1                 | 1 (100.00) 1                 | 1 (33.33) 1                   | 2 (66.67) 2                 | 2 (100.00) 2                 | 1 (33.33) 1                   |
| Respiratory, thoracic and mediastinal disorders      | 1 (100.00) 1                | 1 (100.00) 2             | -                             | 2 (100.00) 3                | -                            | 1 (33.33) 1                   | 3 (100.00) 4                | 1 (50.00) 2                  | 1 (33.33) 1                   |
| Cough                                                | -                           | 1 (100.00) 1             | -                             | -                           | -                            | -                             | -                           | 1 (50.00) 1                  | -                             |
| Oropharyngeal pain                                   | 1 (100.00) 1                | -                        | -                             | 1 (50.00) 1                 | -                            | 1 (33.33) 1                   | 2 (66.67) 2                 | -                            | 1 (33.33) 1                   |
| Rhinorrhea                                           | -                           | -                        | -                             | 1 (50.00) 1                 | -                            | -                             | 1 (33.33) 1                 | -                            | -                             |
| Sneezing                                             | -                           | 1 (100.00) 1             | -                             | 1 (50.00) 1                 | -                            | -                             | 1 (33.33) 1                 | 1 (50.00) 1                  | -                             |

-TEAE = treatment-emergent adverse event; N = number of Subjects at risk; E = number of TEAE..

-TEAE are those adverse events which occurred after first dose of study medication.

-N1=Number of Subject at dose I N2=Number of Subject at dose II .N3=Number of Subject at dose III .

- IP = Investigational product.

-Percentage for the "Subject with at least one TEAE" were based on the total number of subjects per Dose.

--Percentage for the system organ class and preferred terms rows based on the total number of subjects with at least one TEAE.

System organ class are sorted by descending frequency in the overall treatment group preferred terms are sorted by descending frequency in the overall treatment group within system organ class Related includes possible and probable.

Adverse events were coded using MedDRA version 23. If a subject has multiple occurrences of an AE, the subject is presented only once in the respective subject count column (n) for the corresponding AE. Events are counted each time in the event (E) column

Table 5 Summary of Treatment Emergent Adverse Events by System Organ Class and Preferred Term (Age >60 years, Safety Population)

|                                                      | ZyCoV-D<br>(N=924)          |                              |                               | Placebo<br>(N=923)          |                              |                               | Overall<br>(N=1847)          |                               |                                |
|------------------------------------------------------|-----------------------------|------------------------------|-------------------------------|-----------------------------|------------------------------|-------------------------------|------------------------------|-------------------------------|--------------------------------|
|                                                      | Dose I<br>(N1=924)<br>n(%)E | Dose II<br>(N1=885)<br>n(%)E | Dose III<br>(N1=869)<br>n(%)E | Dose I<br>(N2=923)<br>n(%)E | Dose II<br>(N2=878)<br>n(%)E | Dose III<br>(N2=863)<br>n(%)E | Dose I<br>(N3=1847)<br>n(%)E | Dose II<br>(N3=1763)<br>n(%)E | Dose III<br>(N3=1732)<br>n(%)E |
| <b>Solicited Adverse Events</b>                      |                             |                              |                               |                             |                              |                               |                              |                               |                                |
| Subject with any TEAE related to the IP              | 7 (0.76) 11                 | 10 (1.13) 11                 | 14 (1.61) 14                  | 18 (1.95) 24                | 13 (1.48) 13                 | 10 (1.16) 10                  | 25 (1.35) 35                 | 23 (1.30) 24                  | 24 (1.39) 24                   |
| Gastrointestinal disorders                           | -                           | -                            | 1 (7.14) 1                    | -                           | 1 (7.69) 1                   | -                             | -                            | 1 (4.35) 1                    | 1 (4.17) 1                     |
| Diarrhoea                                            | -                           | -                            | -                             | -                           | 1 (7.69) 1                   | -                             | -                            | 1 (4.35) 1                    | -                              |
| Nausea                                               | -                           | -                            | 1 (7.14) 1                    | -                           | -                            | -                             | -                            | -                             | 1 (4.17) 1                     |
| General disorders and administration site conditions | 5 (71.43) 8                 | 4 (40.00) 4                  | 6 (42.86) 6                   | 10 (55.56) 13               | 7 (53.85) 7                  | 5 (50.00) 5                   | 15 (60.00) 21                | 11 (47.83) 11                 | 11 (45.83) 11                  |
| Fatigue                                              | 1 (14.29) 1                 | 2 (20.00) 2                  | 2 (14.29) 2                   | 1 (5.56) 1                  | 4 (30.77) 4                  | -                             | 2 (8.00) 2                   | 6 (26.09) 6                   | 2 (8.33) 2                     |
| Injection site pain                                  | 5 (71.43) 5                 | 1 (10.00) 1                  | 1 (7.14) 1                    | 7 (38.89) 7                 | 2 (15.38) 2                  | 2 (20.00) 2                   | 12 (48.00) 12                | 3 (13.04) 3                   | 3 (12.50) 3                    |
| Pyrexia                                              | 1 (14.29) 1                 | 1 (10.00) 1                  | 2 (14.29) 2                   | -                           | 1 (7.69) 1                   | 2 (20.00) 2                   | 1 (4.00) 1                   | 2 (8.70) 2                    | 4 (16.67) 4                    |
| Swelling                                             | 1 (14.29) 1                 | -                            | 1 (7.14) 1                    | 5 (27.78) 5                 | -                            | 1 (10.00) 1                   | 6 (24.00) 6                  | -                             | 2 (8.33) 2                     |
| Musculoskeletal and connective tissue disorders      | 1 (14.29) 1                 | -                            | 1 (7.14) 1                    | 3 (16.67) 3                 | 1 (7.69) 1                   | 2 (20.00) 2                   | 4 (16.00) 4                  | 1 (4.35) 1                    | 3 (12.50) 3                    |
| Myalgia                                              | 1 (14.29) 1                 | -                            | 1 (7.14) 1                    | 3 (16.67) 3                 | 1 (7.69) 1                   | 2 (20.00) 2                   | 4 (16.00) 4                  | 1 (4.35) 1                    | 3 (12.50) 3                    |
| Nervous system disorders                             | 2 (28.57) 2                 | 2 (20.00) 2                  | 3 (21.43) 3                   | 3 (16.67) 3                 | 1 (7.69) 1                   | 1 (10.00) 1                   | 5 (20.00) 5                  | 3 (13.04) 3                   | 4 (16.67) 4                    |
| Headache                                             | 2 (28.57) 2                 | 2 (20.00) 2                  | 3 (21.43) 3                   | 3 (16.67) 3                 | 1 (7.69) 1                   | 1 (10.00) 1                   | 5 (20.00) 5                  | 3 (13.04) 3                   | 4 (16.67) 4                    |

|                                                      | ZyCoV-D<br>(N=924)          |                              |                               | Placebo<br>(N=923)          |                              |                               | Overall<br>(N=1847)          |                               |                                |
|------------------------------------------------------|-----------------------------|------------------------------|-------------------------------|-----------------------------|------------------------------|-------------------------------|------------------------------|-------------------------------|--------------------------------|
|                                                      | Dose I<br>(N1=924)<br>n(%)E | Dose II<br>(N1=885)<br>n(%)E | Dose III<br>(N1=869)<br>n(%)E | Dose I<br>(N2=923)<br>n(%)E | Dose II<br>(N2=878)<br>n(%)E | Dose III<br>(N2=863)<br>n(%)E | Dose I<br>(N3=1847)<br>n(%)E | Dose II<br>(N3=1763)<br>n(%)E | Dose III<br>(N3=1732)<br>n(%)E |
| Skin and subcutaneous tissue disorders               | -                           | 5 (50.00) 5                  | 3 (21.43) 3                   | 5 (27.78) 5                 | 2 (15.38) 2                  | 2 (20.00) 2                   | 5 (20.00) 5                  | 7 (30.43) 7                   | 5 (20.83) 5                    |
| Erythema                                             | -                           | 4 (40.00) 4                  | 2 (14.29) 2                   | 4 (22.22) 4                 | -                            | 1 (10.00) 1                   | 4 (16.00) 4                  | 4 (17.39) 4                   | 3 (12.50) 3                    |
| Pruritus                                             | -                           | 1 (10.00) 1                  | 1 (7.14) 1                    | 1 (5.56) 1                  | 2 (15.38) 2                  | 1 (10.00) 1                   | 1 (4.00) 1                   | 3 (13.04) 3                   | 2 (8.33) 2                     |
| <b>Unsolicited Adverse Events</b>                    |                             |                              |                               |                             |                              |                               |                              |                               |                                |
| Subject with any TEAE related to the IP              | 1 (0.11) 1                  | 1 (0.11) 3                   | 15 (1.73) 29                  | 3 (0.33) 8                  | -                            | 16 (1.85) 22                  | 4 (0.22) 9                   | 1 (0.06) 3                    | 31 (1.79) 51                   |
| Gastrointestinal disorders                           | -                           | -                            | 3 (20.00) 4                   | -                           | -                            | 1 (6.25) 1                    | -                            | -                             | 4 (12.90) 5                    |
| Abdominal pain                                       | -                           | -                            | 1 (6.67) 1                    | -                           | -                            | -                             | -                            | -                             | 1 (3.23) 1                     |
| Gastroesophageal reflux disease                      | -                           | -                            | 1 (6.67) 1                    | -                           | -                            | -                             | -                            | -                             | 1 (3.23) 1                     |
| Nausea                                               | -                           | -                            | 1 (6.67) 1                    | -                           | -                            | -                             | -                            | -                             | 1 (3.23) 1                     |
| Vomiting                                             | -                           | -                            | 1 (6.67) 1                    | -                           | -                            | 1 (6.25) 1                    | -                            | -                             | 2 (6.45) 2                     |
| General disorders and administration site conditions | 1 (100.00) 1                | 1 (100.00) 1                 | 6 (40.00) 8                   | 2 (66.67) 2                 | -                            | 7 (43.75) 7                   | 3 (75.00) 3                  | 1 (100.00) 1                  | 13 (41.94) 15                  |
| Asthenia                                             | -                           | -                            | 1 (6.67) 1                    | -                           | -                            | -                             | -                            | -                             | 1 (3.23) 1                     |
| Pain                                                 | -                           | -                            | 3 (20.00) 3                   | -                           | -                            | -                             | -                            | -                             | 3 (9.68) 3                     |
| Pyrexia                                              | 1 (100.00) 1                | 1 (100.00) 1                 | 4 (26.67) 4                   | 2 (66.67) 2                 | -                            | 7 (43.75) 7                   | 3 (75.00) 3                  | 1 (100.00) 1                  | 11 (35.48) 11                  |
| Infections and infestations                          | -                           | 1 (100.00) 1                 | 2 (13.33) 2                   | 1 (33.33) 1                 | -                            | 3 (18.75) 3                   | 1 (25.00) 1                  | 1 (100.00) 1                  | 5 (16.13) 5                    |

|                                                 | ZyCoV-D<br>(N=924)          |                              |                               | Placebo<br>(N=923)          |                              |                               | Overall<br>(N=1847)          |                               |                                |
|-------------------------------------------------|-----------------------------|------------------------------|-------------------------------|-----------------------------|------------------------------|-------------------------------|------------------------------|-------------------------------|--------------------------------|
|                                                 | Dose I<br>(N1=924)<br>n(%)E | Dose II<br>(N1=885)<br>n(%)E | Dose III<br>(N1=869)<br>n(%)E | Dose I<br>(N2=923)<br>n(%)E | Dose II<br>(N2=878)<br>n(%)E | Dose III<br>(N2=863)<br>n(%)E | Dose I<br>(N3=1847)<br>n(%)E | Dose II<br>(N3=1763)<br>n(%)E | Dose III<br>(N3=1732)<br>n(%)E |
| Nasopharyngitis                                 | -                           | 1 (100.00)<br>1              | 2 (13.33)<br>2                | 1 (33.33) 1                 | -                            | 3 (18.75)<br>3                | 1 (25.00) 1                  | 1 (100.00)<br>1               | 5 (16.13) 5                    |
| Investigations                                  | -                           | -                            | 1 (6.67) 5                    | -                           | -                            | -                             | -                            | -                             | 1 (3.23) 5                     |
| Blood creatinine increased                      | -                           | -                            | 1 (6.67) 1                    | -                           | -                            | -                             | -                            | -                             | 1 (3.23) 1                     |
| Blood glucose increased                         | -                           | -                            | 1 (6.67) 1                    | -                           | -                            | -                             | -                            | -                             | 1 (3.23) 1                     |
| Blood pressure systolic increased               | -                           | -                            | 1 (6.67) 1                    | -                           | -                            | -                             | -                            | -                             | 1 (3.23) 1                     |
| Blood sodium increased                          | -                           | -                            | 1 (6.67) 1                    | -                           | -                            | -                             | -                            | -                             | 1 (3.23) 1                     |
| Full blood count increased                      | -                           | -                            | 1 (6.67) 1                    | -                           | -                            | -                             | -                            | -                             | 1 (3.23) 1                     |
| Musculoskeletal and connective tissue disorders | -                           | -                            | 1 (6.67) 1                    | -                           | -                            | 1 (6.25) 1                    | -                            | -                             | 2 (6.45) 2                     |
| Myalgia                                         | -                           | -                            | 1 (6.67) 1                    | -                           | -                            | -                             | -                            | -                             | 1 (3.23) 1                     |
| Pain in extremity                               | -                           | -                            | -                             | -                           | -                            | 1 (6.25) 1                    | -                            | -                             | 1 (3.23) 1                     |
| Nervous system disorders                        | -                           | -                            | 2 (13.33)<br>2                | 3 (100.00)<br>4             | -                            | 4 (25.00)<br>4                | 3 (75.00) 4                  | -                             | 6 (19.35) 6                    |
| Ageusia                                         | -                           | -                            | -                             | 1 (33.33) 1                 | -                            | -                             | 1 (25.00) 1                  | -                             | -                              |
| Cerebral infarction                             | -                           | -                            | 1 (6.67) 1                    | -                           | -                            | -                             | -                            | -                             | 1 (3.23) 1                     |
| Headache                                        | -                           | -                            | 1 (6.67) 1                    | 3 (100.00)<br>3             | -                            | 4 (25.00)<br>4                | 3 (75.00) 3                  | -                             | 5 (16.13) 5                    |
| Respiratory, thoracic and mediastinal disorders | -                           | 1 (100.00)<br>1              | 6 (40.00)<br>7                | 1 (33.33) 1                 | -                            | 6 (37.50)<br>6                | 1 (25.00) 1                  | 1 (100.00)<br>1               | 12 (38.71)<br>13               |
| Cough                                           | -                           | 1 (100.00)<br>1              | 4 (26.67)<br>4                | -                           | -                            | 4 (25.00)<br>4                | -                            | 1 (100.00)<br>1               | 8 (25.81) 8                    |
| Nasal dryness                                   | -                           | -                            | 1 (6.67) 1                    | -                           | -                            | -                             | -                            | -                             | 1 (3.23) 1                     |

|                    | ZyCoV-D<br>(N=924)          |                              |                               | Placebo<br>(N=923)          |                              |                               | Overall<br>(N=1847)          |                               |                                |
|--------------------|-----------------------------|------------------------------|-------------------------------|-----------------------------|------------------------------|-------------------------------|------------------------------|-------------------------------|--------------------------------|
|                    | Dose I<br>(N1=924)<br>n(%)E | Dose II<br>(N1=885)<br>n(%)E | Dose III<br>(N1=869)<br>n(%)E | Dose I<br>(N2=923)<br>n(%)E | Dose II<br>(N2=878)<br>n(%)E | Dose III<br>(N2=863)<br>n(%)E | Dose I<br>(N3=1847)<br>n(%)E | Dose II<br>(N3=1763)<br>n(%)E | Dose III<br>(N3=1732)<br>n(%)E |
| Oropharyngeal pain | -                           | -                            | 1 (6.67) 1                    | 1 (33.33) 1                 | -                            | 2 (12.50)<br>2                | 1 (25.00) 1                  | -                             | 3 (9.68) 3                     |
| Rhinorrhea         | -                           | -                            | 1 (6.67) 1                    | -                           | -                            | -                             | -                            | -                             | 1 (3.23) 1                     |

-TEAE = treatment-emergent adverse event; N = number of Subjects at risk; E = number of TEAE..  
-TEAE are those adverse events which occurred after first dose of study medication.  
-N1=Number of Subject at dose I . N2=Number of Subject at dose II .N3=Number of Subject at dose III .  
- IP = Investigational product.  
-Percentage for the “Subject with at least one TEAE” were based on the total number of subjects per Dose.  
--Percentage for the system organ class and preferred terms rows based on the total number of subjects with at least one TEAE.  
System organ class are sorted by descending frequency in the overall treatment group preferred terms are sorted by descending frequency in the overall treatment group within system organ class Related includes possible and probable.  
Adverse events were coded using MedDRA version 23. If a subject has multiple occurrences of an AE, the subject is presented only once in the respective subject count column (n) for the corresponding AE. Events are counted each time in the event (E) column

Table 6 Summary of Treatment Emergent Adverse Events by System Organ Class and Preferred Term (Comorbid Subjects, Safety Population)

|                                         | ZyCoV-D<br>(N=709)          |                          |                               | Placebo<br>(N=740)          |                              |                               | Overall<br>(N=1449)          |                               |                                |
|-----------------------------------------|-----------------------------|--------------------------|-------------------------------|-----------------------------|------------------------------|-------------------------------|------------------------------|-------------------------------|--------------------------------|
|                                         | Dose I<br>(N1=709)<br>n(%)E | Dose II<br>(N1=688)n(%)E | Dose III<br>(N1=658)<br>n(%)E | Dose I<br>(N2=740)<br>n(%)E | Dose II<br>(N2=713)<br>n(%)E | Dose III<br>(N2=684)<br>n(%)E | Dose I<br>(N3=1449)<br>n(%)E | Dose II<br>(N3=1401)<br>n(%)E | Dose III<br>(N3=1342)<br>n(%)E |
| <b>Solicited Adverse Events</b>         |                             |                          |                               |                             |                              |                               |                              |                               |                                |
| Subject with any TEAE related to the IP | 11 (1.55) 20                | 3 (0.44) 3               | 8 (1.22) 9                    | 22 (2.97) 50                | 11 (1.54) 13                 | 7 (1.02) 7                    | 33 (2.28) 70                 | 14 (1.00) 16                  | 15 (1.12) 16                   |
| Gastrointestinal disorders              | 1 (9.09) 1                  | -                        | -                             | 1 (4.55) 1                  | 1 (9.09) 1                   | -                             | 2 (6.06) 2                   | 1 (7.14) 1                    | -                              |
| Diarrhoea                               | 1 (9.09) 1                  | -                        | -                             | 1 (4.55) 1                  | 1 (9.09) 1                   | -                             | 2 (6.06) 2                   | 1 (7.14) 1                    | -                              |

|                                                      | ZyCoV-D<br>(N=709)          |                          |                               | Placebo<br>(N=740)          |                              |                               | Overall<br>(N=1449)          |                               |                                |
|------------------------------------------------------|-----------------------------|--------------------------|-------------------------------|-----------------------------|------------------------------|-------------------------------|------------------------------|-------------------------------|--------------------------------|
|                                                      | Dose I<br>(N1=709)<br>n(%)E | Dose II<br>(N1=688)n(%)E | Dose III<br>(N1=658)<br>n(%)E | Dose I<br>(N2=740)<br>n(%)E | Dose II<br>(N2=713)<br>n(%)E | Dose III<br>(N2=684)<br>n(%)E | Dose I<br>(N3=1449)<br>n(%)E | Dose II<br>(N3=1401)<br>n(%)E | Dose III<br>(N3=1342)<br>n(%)E |
| General disorders and administration site conditions | 7 (63.64)<br>12             | 1 (33.33) 1              | 3 (37.50)<br>3                | 18 (81.82)<br>27            | 9 (81.82) 9                  | 3 (42.86)<br>3                | 25 (75.76)<br>39             | 10 (71.43)<br>10              | 6 (40.00) 6                    |
| Fatigue                                              | 1 (9.09) 1                  | 1 (33.33) 1              | -                             | 1 (4.55) 1                  | 4 (36.36) 4                  | -                             | 2 (6.06) 2                   | 5 (35.71) 5                   | -                              |
| Injection site pain                                  | 6 (54.55) 6                 | -                        | 1 (12.50)<br>1                | 13 (59.09)<br>13            | 1 (9.09) 1                   | 1 (14.29)<br>1                | 19 (57.58)<br>19             | 1 (7.14) 1                    | 2 (13.33) 2                    |
| Pyrexia                                              | 2 (18.18) 2                 | -                        | 2 (25.00)<br>2                | 3 (13.64) 3                 | 4 (36.36) 4                  | 2 (28.57)<br>2                | 5 (15.15) 5                  | 4 (28.57) 4                   | 4 (26.67) 4                    |
| Swelling                                             | 3 (27.27) 3                 | -                        |                               | 10 (45.45)<br>10            | -                            | -                             | 13 (39.39)<br>13             | -                             | -                              |
| Musculoskeletal and connective tissue disorders      | 3 (27.27) 3                 | -                        | 2 (25.00)<br>2                | 11 (50.00)<br>11            | -                            | 3 (42.86)<br>3                | 14 (42.42)<br>14             | -                             | 5 (33.33) 5                    |
| Arthralgia                                           | -                           | -                        | 1 (12.50)<br>1                | 1 (4.55) 1                  | -                            | -                             | 1 (3.03) 1                   | -                             | 1 (6.67) 1                     |
| Myalgia                                              | 3 (27.27) 3                 | -                        | 1 (12.50)<br>1                | 10 (45.45)<br>10            | -                            | 3 (42.86)<br>3                | 13 (39.39)<br>13             | -                             | 4 (26.67) 4                    |
| Nervous system disorders                             | 2 (18.18) 2                 | 1 (33.33) 1              | 3 (37.50)<br>3                | 3 (13.64) 3                 | 2 (18.18) 2                  | 1 (14.29)<br>1                | 5 (15.15) 5                  | 3 (21.43) 3                   | 4 (26.67) 4                    |
| Headache                                             | 2 (18.18) 2                 | 1 (33.33) 1              | 3 (37.50)<br>3                | 3 (13.64) 3                 | 2 (18.18) 2                  | 1 (14.29)<br>1                | 5 (15.15) 5                  | 3 (21.43) 3                   | 4 (26.67) 4                    |
| Skin and subcutaneous tissue disorders               | 1 (9.09) 1                  | 1 (33.33) 1              | 1 (12.50)<br>1                | 7 (31.82) 8                 | 1 (9.09) 1                   | -                             | 8 (24.24) 9                  | 2 (14.29) 2                   | 1 (6.67) 1                     |
| Erythema                                             | 1 (9.09) 1                  | 1 (33.33) 1              | 1 (12.50)<br>1                | 5 (22.73) 5                 | -                            | -                             | 6 (18.18) 6                  | 1 (7.14) 1                    | 1 (6.67) 1                     |
| Pruritus                                             | -                           | -                        | -                             | 3 (13.64) 3                 | 1 (9.09) 1                   | -                             | 3 (9.09) 3                   | 1 (7.14) 1                    | -                              |
| <b>Unsolicited Adverse Events</b>                    |                             |                          |                               |                             |                              |                               |                              |                               |                                |

|                                                      | ZyCoV-D<br>(N=709)          |                          |                               | Placebo<br>(N=740)          |                              |                               | Overall<br>(N=1449)          |                               |                                |
|------------------------------------------------------|-----------------------------|--------------------------|-------------------------------|-----------------------------|------------------------------|-------------------------------|------------------------------|-------------------------------|--------------------------------|
|                                                      | Dose I<br>(N1=709)<br>n(%)E | Dose II<br>(N1=688)n(%)E | Dose III<br>(N1=658)<br>n(%)E | Dose I<br>(N2=740)<br>n(%)E | Dose II<br>(N2=713)<br>n(%)E | Dose III<br>(N2=684)<br>n(%)E | Dose I<br>(N3=1449)<br>n(%)E | Dose II<br>(N3=1401)<br>n(%)E | Dose III<br>(N3=1342)<br>n(%)E |
| Subject with any TEAE related to the IP              | 2 (0.28) 4                  | 6 (0.87) 18              | 19 (2.89) 38                  | 3 (0.41) 8                  | 3 (0.42) 6                   | 21 (3.07) 38                  | 5 (0.35) 12                  | 9 (0.64) 24                   | 40 (2.98) 76                   |
| Gastrointestinal disorders                           | -                           | -                        | 2 (10.53) 2                   | -                           | -                            | 4 (19.05) 5                   | -                            | -                             | 6 (15.00) 7                    |
| Abdominal distension                                 | -                           | -                        | -                             | -                           | -                            | 1 (4.76) 1                    | -                            | -                             | 1 (2.50) 1                     |
| Abdominal pain                                       | -                           | -                        | 2 (10.53) 2                   | -                           | -                            | 1 (4.76) 1                    | -                            | -                             | 3 (7.50) 3                     |
| Gastroesophageal reflux disease                      | -                           | -                        | -                             | -                           | -                            | 1 (4.76) 1                    | -                            | -                             | 1 (2.50) 1                     |
| Vomiting                                             | -                           | -                        | -                             | -                           | -                            | 2 (9.52) 2                    | -                            | -                             | 2 (5.00) 2                     |
| General disorders and administration site conditions | 2 (100.00) 2                | 5 (83.33) 8              | 8 (42.11) 11                  | 1 (33.33) 1                 | 1 (33.33) 2                  | 8 (38.10) 9                   | 3 (60.00) 3                  | 6 (66.67) 10                  | 16 (40.00) 20                  |
| Asthenia                                             | -                           | 2 (33.33) 2              | 2 (10.53) 2                   | 1 (33.33) 1                 | -                            | -                             | 1 (20.00) 1                  | 2 (22.22) 2                   | 2 (5.00) 2                     |
| Fatigue                                              | -                           | -                        | -                             | -                           | -                            | 2 (9.52) 2                    | -                            | -                             | 2 (5.00) 2                     |
| Pain                                                 | -                           | 3 (50.00) 3              | 4 (21.05) 4                   | -                           | 1 (33.33) 1                  | 1 (4.76) 1                    | -                            | 4 (44.44) 4                   | 5 (12.50) 5                    |
| Pyrexia                                              | 2 (100.00) 2                | 3 (50.00) 3              | 5 (26.32) 5                   | -                           | 1 (33.33) 1                  | 5 (23.81) 6                   | 2 (40.00) 2                  | 4 (44.44) 4                   | 10 (25.00) 11                  |
| Infections and infestations                          | -                           | -                        | 1 (5.26) 1                    | -                           | -                            | 3 (14.29) 3                   | -                            | -                             | 4 (10.00) 4                    |
| Nasopharyngitis                                      | -                           | -                        | 1 (5.26) 1                    | -                           | -                            | 3 (14.29) 3                   | -                            | -                             | 4 (10.00) 4                    |
| Investigations                                       | -                           | -                        | 1 (5.26) 5                    | -                           | -                            | -                             | -                            | -                             | 1 (2.50) 5                     |
| Blood creatinine increased                           | -                           | -                        | 1 (5.26) 1                    | -                           | -                            | -                             | -                            | -                             | 1 (2.50) 1                     |



|                                                 | ZyCoV-D<br>(N=709)          |                          |                               | Placebo<br>(N=740)          |                              |                               | Overall<br>(N=1449)          |                               |                                |
|-------------------------------------------------|-----------------------------|--------------------------|-------------------------------|-----------------------------|------------------------------|-------------------------------|------------------------------|-------------------------------|--------------------------------|
|                                                 | Dose I<br>(N1=709)<br>n(%)E | Dose II<br>(N1=688)n(%)E | Dose III<br>(N1=658)<br>n(%)E | Dose I<br>(N2=740)<br>n(%)E | Dose II<br>(N2=713)<br>n(%)E | Dose III<br>(N2=684)<br>n(%)E | Dose I<br>(N3=1449)<br>n(%)E | Dose II<br>(N3=1401)<br>n(%)E | Dose III<br>(N3=1342)<br>n(%)E |
| Blood glucose increased                         | -                           | -                        | 1 (5.26) 1                    | -                           | -                            | -                             | -                            | -                             | 1 (2.50) 1                     |
| Blood pressure systolic increased               | -                           | -                        | 1 (5.26) 1                    | -                           | -                            | -                             | -                            | -                             | 1 (2.50) 1                     |
| Blood sodium increased                          | -                           | -                        | 1 (5.26) 1                    | -                           | -                            | -                             | -                            | -                             | 1 (2.50) 1                     |
| Full blood count increased                      | -                           | -                        | 1 (5.26) 1                    | -                           | -                            | -                             | -                            | -                             | 1 (2.50) 1                     |
| Musculoskeletal and connective tissue disorders | -                           | -                        | -                             | -                           | -                            | 4 (19.05)<br>4                | -                            | -                             | 4 (10.00) 4                    |
| Arthralgia                                      | -                           | -                        | -                             | -                           | -                            | 2 (9.52) 2                    | -                            | -                             | 2 (5.00) 2                     |
| Myalgia                                         | -                           | -                        | -                             | -                           | -                            | 2 (9.52) 2                    | -                            | -                             | 2 (5.00) 2                     |
| Nervous system disorders                        | -                           | 3 (50.00) 3              | 7 (36.84)<br>7                | 3 (100.00)<br>4             | -                            | 4 (19.05)<br>5                | 3 (60.00) 4                  | 3 (33.33) 3                   | 11 (27.50)<br>12               |
| Ageusia                                         | -                           | -                        | -                             | -                           | -                            | 2 (9.52) 2                    | -                            | -                             | 2 (5.00) 2                     |
| Anosmia                                         | -                           | -                        | 1 (5.26) 1                    | -                           | -                            | 1 (4.76) 1                    | -                            | -                             | 2 (5.00) 2                     |
| Cerebral infarction                             | -                           | -                        | 1 (5.26) 1                    | -                           | -                            | -                             | -                            | -                             | 1 (2.50) 1                     |
| Cerebrovascular accident                        | -                           | -                        | -                             | 1 (33.33) 1                 | -                            | -                             | 1 (20.00) 1                  | -                             | -                              |
| Dizziness                                       | -                           | -                        | 1 (5.26) 1                    | -                           | -                            | -                             | -                            | -                             | 1 (2.50) 1                     |
| Headache                                        | -                           | 3 (50.00) 3              | 4 (21.05)<br>4                | 2 (66.67) 2                 | -                            | 2 (9.52) 2                    | 2 (40.00) 2                  | 3 (33.33) 3                   | 6 (15.00) 6                    |
| Somnolence                                      | -                           | -                        | -                             | 1 (33.33) 1                 | -                            | -                             | 1 (20.00) 1                  | -                             | -                              |
| Respiratory, thoracic and mediastinal disorders | 1 (50.00) 1                 | 4 (66.67) 5              | 9 (47.37)<br>10               | 2 (66.67) 2                 | 3 (100.00)<br>4              | 9 (42.86)<br>10               | 3 (60.00) 3                  | 7 (77.78) 9                   | 18 (45.00)<br>20               |
| Cough                                           | 1 (50.00) 1                 | 3 (50.00) 3              | 5 (26.32)<br>5                | -                           | 2 (66.67) 2                  | 5 (23.81)<br>5                | 1 (20.00) 1                  | 5 (55.56) 5                   | 10 (25.00)<br>10               |
| Hypoxia                                         | -                           | -                        | -                             | -                           | -                            | 1 (4.76) 1                    | -                            | -                             | 1 (2.50) 1                     |

|                    | ZyCoV-D<br>(N=709)          |                          |                               | Placebo<br>(N=740)          |                              |                               | Overall<br>(N=1449)          |                               |                                |
|--------------------|-----------------------------|--------------------------|-------------------------------|-----------------------------|------------------------------|-------------------------------|------------------------------|-------------------------------|--------------------------------|
|                    | Dose I<br>(N1=709)<br>n(%)E | Dose II<br>(N1=688)n(%)E | Dose III<br>(N1=658)<br>n(%)E | Dose I<br>(N2=740)<br>n(%)E | Dose II<br>(N2=713)<br>n(%)E | Dose III<br>(N2=684)<br>n(%)E | Dose I<br>(N3=1449)<br>n(%)E | Dose II<br>(N3=1401)<br>n(%)E | Dose III<br>(N3=1342)<br>n(%)E |
| Nasal dryness      | -                           | -                        | 1 (5.26) 1                    | -                           | -                            | -                             | -                            | -                             | 1 (2.50) 1                     |
| Oropharyngeal pain | -                           | 1 (16.67) 1              | 3 (15.79) 3                   | 2 (66.67) 2                 | 2 (66.67) 2                  | 4 (19.05) 4                   | 2 (40.00) 2                  | 3 (33.33) 3                   | 7 (17.50) 7                    |
| Rhinorrhea         | -                           | -                        | 1 (5.26) 1                    | -                           | -                            | -                             | -                            | -                             | 1 (2.50) 1                     |
| Sneezing           | -                           | 1 (16.67) 1              | -                             | -                           | -                            | -                             | -                            | 1 (11.11) 1                   | -                              |
| Vascular disorders | -                           | -                        | -                             | 1 (33.33) 1                 | -                            | -                             | 1 (20.00) 1                  | -                             | -                              |
| Hypertension       | -                           | -                        | -                             | 1 (33.33) 1                 | -                            | -                             | 1 (20.00) 1                  | -                             | -                              |

-TEAE = treatment-emergent adverse event; N = number of Subjects at risk; E = number of TEAE.  
-TEAE are those adverse events which occurred after first dose of study medication.  
-N1=Number of Subject at dose I . N2=Number of Subject at dose II .N3=Number of Subject at dose III.  
- IP = Investigational product.  
-Percentage for the “Subject with at least one TEAE” were based on the total number of subjects per Dose.  
--Percentage for the system organ class and preferred terms rows based on the total number of subjects with at least one TEAE.  
System organ class are sorted by descending frequency in the overall treatment group preferred terms are sorted by descending frequency in the overall treatment group within system organ class Related includes possible and probable.  
Adverse events were coded using MedDRA version 23 . If a subject has multiple occurrences of an AE, the subject is presented only once in the respective subject count column (n) for the corresponding AE. Events are counted each time in the event (E) column

Table 7 Summary of Solicited Local Adverse Events and Solicited Systemic Adverse Events (Age: 12-17 years, Safety Population)

|                                       | ZyCoV-D<br>(N=447)          |                              |                               | Placebo<br>(N=487)          |                              |                               | Overall<br>(N=934)          |                              |                               |
|---------------------------------------|-----------------------------|------------------------------|-------------------------------|-----------------------------|------------------------------|-------------------------------|-----------------------------|------------------------------|-------------------------------|
|                                       | Dose I<br>(N1=447)<br>n(%)E | Dose II<br>(N1=330)<br>n(%)E | Dose III<br>(N1=210)<br>n(%)E | Dose I<br>(N2=487)<br>n(%)E | Dose II<br>(N2=363)<br>n(%)E | Dose III<br>(N2=248)<br>n(%)E | Dose I<br>(N3=934)<br>n(%)E | Dose II<br>(N3=693)<br>n(%)E | Dose III<br>(N3=458)<br>n(%)E |
| <b>Solicited Local Adverse Events</b> |                             |                              |                               |                             |                              |                               |                             |                              |                               |

|                                          | ZyCoV-D<br>(N=447)          |                              |                               | Placebo<br>(N=487)          |                              |                               | Overall<br>(N=934)          |                              |                               |
|------------------------------------------|-----------------------------|------------------------------|-------------------------------|-----------------------------|------------------------------|-------------------------------|-----------------------------|------------------------------|-------------------------------|
|                                          | Dose I<br>(N1=447)<br>n(%)E | Dose II<br>(N1=330)<br>n(%)E | Dose III<br>(N1=210)<br>n(%)E | Dose I<br>(N2=487)<br>n(%)E | Dose II<br>(N2=363)<br>n(%)E | Dose III<br>(N2=248)<br>n(%)E | Dose I<br>(N3=934)<br>n(%)E | Dose II<br>(N3=693)<br>n(%)E | Dose III<br>(N3=458)<br>n(%)E |
| Pain injection site                      | 10(2.24) 11                 | 1(0.30) 1                    | -                             | 5(1.03) 5                   | 1(0.28) 1                    | 2(0.81) 2                     | 15(1.61) 16                 | 2(0.29) 2                    | 2(0.44) 2                     |
| Mild                                     | 10(100) 11                  | 1(100) 1                     | -                             | 5(100) 5                    | 1(100) 1                     | 2(100) 2                      | 15(100) 16                  | 2(100) 2                     | 2(100) 2                      |
| Redness                                  | 2(0.45) 2                   | 2(0.61) 2                    | -                             | -                           | 1(0.28) 1                    | 1(0.40) 1                     | 2(0.21) 2                   | 3(0.43) 3                    | 1(0.22) 1                     |
| Mild                                     | 2(100) 2                    | 2(100) 2                     | -                             | -                           | 1(100) 1                     | 1(100) 1                      | 2(100) 2                    | 3(100) 3                     | 1(100) 1                      |
| Swelling                                 | 1(0.22) 1                   | -                            | -                             | -                           | 1(0.28) 1                    | -                             | 1(0.11) 1                   | 1(0.14) 1                    | -                             |
| Mild                                     | 1(100) 1                    | -                            | -                             | -                           | 1(100) 1                     | -                             | 1(100) 1                    | 1(100) 1                     | -                             |
| Itching                                  | 2(0.45) 3                   | -                            | -                             | 1(0.21) 2                   | -                            | -                             | 3(0.32) 5                   | -                            | -                             |
| Mild                                     | 2(100) 3                    | -                            | -                             | 1(100) 2                    | -                            | -                             | 3(100) 5                    | -                            | -                             |
| <b>Solicited Systemic Adverse Events</b> |                             |                              |                               |                             |                              |                               |                             |                              |                               |
| Diarrhoea                                | -                           | -                            | -                             | -                           | -                            | -                             | -                           | -                            | -                             |
| Arthralgia                               | -                           | -                            | -                             | 2(0.41) 2                   | -                            | -                             | 2(0.21) 2                   | -                            | -                             |
| Mild                                     | -                           | -                            | -                             | 2(100) 2                    | -                            | -                             | 2(100) 2                    | -                            | -                             |
| Muscle Pain                              | -                           | -                            | -                             | 2(0.41) 2                   | -                            | -                             | 2(0.21) 2                   | -                            | -                             |
| Mild                                     | -                           | -                            | -                             | 2(100) 2                    | -                            | -                             | 2(100) 2                    | -                            | -                             |
| Headache                                 | 3(0.67) 3                   | -                            | -                             | 2(0.41) 2                   | 1(0.28) 1                    | -                             | 5(0.54) 5                   | 1(0.14) 1                    | -                             |
| Mild                                     | 3(100) 3                    | -                            | -                             | 2(100) 2                    | 1(100) 1                     | -                             | 5(100) 5                    | 1(100) 1                     | -                             |
| Nausea                                   | -                           | -                            | -                             | -                           | -                            | -                             | -                           | -                            | -                             |
| Malaise                                  | -                           | -                            | -                             | -                           | -                            | -                             | -                           | -                            | -                             |
| Fatigue                                  | 1(0.22) 1                   | -                            | -                             | 3(0.62) 3                   | -                            | -                             | 4(0.43) 4                   | -                            | -                             |
| Mild                                     | 1(100) 1                    | -                            | -                             | 3(100) 3                    | -                            | -                             | 4(100) 4                    | -                            | -                             |
| Fever                                    | 2(0.45) 2                   | -                            | -                             | -                           | -                            | -                             | 2(0.21) 2                   | -                            | -                             |

|      | ZyCoV-D<br>(N=447)          |                              |                               | Placebo<br>(N=487)          |                              |                               | Overall<br>(N=934)          |                              |                               |
|------|-----------------------------|------------------------------|-------------------------------|-----------------------------|------------------------------|-------------------------------|-----------------------------|------------------------------|-------------------------------|
|      | Dose I<br>(N1=447)<br>n(%)E | Dose II<br>(N1=330)<br>n(%)E | Dose III<br>(N1=210)<br>n(%)E | Dose I<br>(N2=487)<br>n(%)E | Dose II<br>(N2=363)<br>n(%)E | Dose III<br>(N2=248)<br>n(%)E | Dose I<br>(N3=934)<br>n(%)E | Dose II<br>(N3=693)<br>n(%)E | Dose III<br>(N3=458)<br>n(%)E |
| Mild | 2(100) 2                    | -                            | -                             | -                           | -                            | -                             | 2(100) 2                    | -                            | -                             |

N = number of Subjects at risk; n=number Subjects with AE; E = number of AE.  
-N1=Number of Subject at dose I N2=Number of Subject at dose II .N3=Number of Subject at dose III .

Table 8 Summary of Solicited Local Adverse Events and Solicited Systemic Adverse Events (Age >60 years, Safety Population)

|                                          | ZyCoV-D<br>(N=924)          |                              |                               | Placebo<br>(N=923)          |                              |                               | Overall<br>(N=1847)          |                               |                                |
|------------------------------------------|-----------------------------|------------------------------|-------------------------------|-----------------------------|------------------------------|-------------------------------|------------------------------|-------------------------------|--------------------------------|
|                                          | Dose I<br>(N1=924)<br>n(%)E | Dose II<br>(N1=885)<br>n(%)E | Dose III<br>(N1=869)<br>n(%)E | Dose I<br>(N2=923)<br>n(%)E | Dose II<br>(N2=878)<br>n(%)E | Dose III<br>(N2=863)<br>n(%)E | Dose I<br>(N3=1847)<br>n(%)E | Dose II<br>(N3=1763)<br>n(%)E | Dose III<br>(N3=1732)<br>n(%)E |
| <b>Solicited Local Adverse Events</b>    |                             |                              |                               |                             |                              |                               |                              |                               |                                |
| Pain injection site                      | 5(0.54) 5                   | 1(0.11) 1                    | 1(0.12) 1                     | 7(0.76) 7                   | 2(0.23) 2                    | 2(0.23) 2                     | 12(0.65) 12                  | 3(0.17) 3                     | 3(0.17) 3                      |
| Mild                                     | 5(100) 5                    | 1(100) 1                     | 1(100) 1                      | 7(100) 7                    | 2(100) 2                     | 2(100) 2                      | 12(100) 12                   | 3(100) 3                      | 3(100) 3                       |
| Redness                                  | -                           | 4(0.45) 4                    | 2(0.23) 2                     | 4(0.43) 4                   | -                            | 1(0.12) 1                     | 4(0.22) 4                    | 4(0.23) 4                     | 3(0.17) 3                      |
| Mild                                     | -                           | 4(100) 4                     | 2(100) 2                      | 4(100) 4                    | -                            | 1(100) 1                      | 4(100) 4                     | 4(100) 4                      | 3(100) 3                       |
| Swelling                                 | 1(0.11) 1                   | -                            | 1(0.12) 1                     | 5(0.54) 5                   | -                            | 1(0.12) 1                     | 6(0.32) 6                    | -                             | 2(0.12) 2                      |
| Mild                                     | 1(100) 1                    | -                            | 1(100) 1                      | 5(100) 5                    | -                            | 1(100) 1                      | 6(100) 6                     | -                             | 2(100) 2                       |
| Itching                                  | -                           | 1(0.11) 1                    | 1(0.12) 1                     | 1(0.11) 1                   | 2(0.23) 2                    | 1(0.12) 1                     | 1(0.05) 1                    | 3(0.17) 3                     | 2(0.12) 2                      |
| Mild                                     | -                           | 1(100) 1                     | -                             | 1(100) 1                    | 2(100) 2                     | 1(100) 1                      | 1(100) 1                     | 3(100) 3                      | 1(50.00) 1                     |
| Moderate                                 | -                           | -                            | 1(100) 1                      | -                           | -                            | -                             | -                            | -                             | 1(50.00) 1                     |
| <b>Solicited Systemic Adverse Events</b> |                             |                              |                               |                             |                              |                               |                              |                               |                                |
| Diarrhoea                                | -                           | -                            | -                             | -                           | 1(0.11) 1                    | -                             | -                            | 1(0.06) 1                     | -                              |

|             | ZyCoV-D<br>(N=924)          |                              |                               | Placebo<br>(N=923)          |                              |                               | Overall<br>(N=1847)          |                               |                                |
|-------------|-----------------------------|------------------------------|-------------------------------|-----------------------------|------------------------------|-------------------------------|------------------------------|-------------------------------|--------------------------------|
|             | Dose I<br>(N1=924)<br>n(%)E | Dose II<br>(N1=885)<br>n(%)E | Dose III<br>(N1=869)<br>n(%)E | Dose I<br>(N2=923)<br>n(%)E | Dose II<br>(N2=878)<br>n(%)E | Dose III<br>(N2=863)<br>n(%)E | Dose I<br>(N3=1847)<br>n(%)E | Dose II<br>(N3=1763)<br>n(%)E | Dose III<br>(N3=1732)<br>n(%)E |
| Moderate    | -                           | -                            | -                             | -                           | 1(100) 1                     | -                             | -                            | 1(100) 1                      | -                              |
| Arthralgia  | -                           | -                            | -                             | -                           | -                            | -                             | -                            | -                             | -                              |
| Muscle Pain | 1(0.11) 1                   | -                            | 1(0.12) 1                     | 3(0.33) 3                   | 1(0.11) 1                    | 2(0.23) 2                     | 4(0.22) 4                    | 1(0.06) 1                     | 3(0.17) 3                      |
| Mild        | 1(100) 1                    | -                            | 1(100) 1                      | 3(100) 3                    | 1(100) 1                     | 2(100) 2                      | 4(100) 4                     | 1(100) 1                      | 3(100) 3                       |
| Headache    | 2(0.22) 2                   | 2(0.23) 2                    | 3(0.35) 3                     | 3(0.33) 3                   | 1(0.11) 1                    | 1(0.12) 1                     | 5(0.27) 5                    | 3(0.17) 3                     | 4(0.23) 4                      |
| Mild        | 2(100) 2                    | 2(100) 2                     | 3(100) 3                      | 3(100) 3                    | 1(100) 1                     | 1(100) 1                      | 5(100) 5                     | 3(100) 3                      | 4(100) 4                       |
| Nausea      | -                           | -                            | 1(0.12) 1                     | -                           | -                            | -                             | -                            | -                             | 1(0.06) 1                      |
| Mild        | -                           | -                            | 1(100) 1                      | -                           | -                            | -                             | -                            | -                             | 1(100) 1                       |
| Malaise     | -                           | -                            | -                             | -                           | -                            | -                             | -                            | -                             | -                              |
| Fatigue     | 1(0.11) 1                   | 2(0.23) 2                    | 2(0.23) 2                     | 1(0.11) 1                   | 4(0.46) 4                    | -                             | 2(0.11) 2                    | 6(0.34) 6                     | 2(0.12) 2                      |
| Mild        | 1(100) 1                    | -                            | 1(50.00) 1                    | 1(100) 1                    | 3(75.00) 3                   | -                             | 2(100) 2                     | 3(50.00) 3                    | 1(50.00) 1                     |
| Moderate    | -                           | 2(100) 2                     | 1(50.00) 1                    | -                           | 1(25.00) 1                   | -                             | -                            | 3(50.00) 3                    | 1(50.00) 1                     |
| Fever       | 1(0.11) 1                   | 1(0.11) 1                    | 2(0.23) 2                     | -                           | 1(0.11) 1                    | 2(0.23) 2                     | 1(0.05) 1                    | 2(0.11) 2                     | 4(0.23) 4                      |
| Mild        | 1(100) 1                    | 1(100) 1                     | 2(100) 2                      | -                           | 1(100) 1                     | 2(100) 2                      | 1(100) 1                     | 2(100) 2                      | 4(100) 4                       |

N = number of Subjects at risk; n=numbr Subjects with AE; E = number of AE.  
-N1=Number of Subject at dose Dose I . N2=Number of Subject at dose Dose II .N3=Number of Subject at dose Dose III .

Table 9 Summary of Solicited Local Adverse Events and Solicited Systemic Adverse Events (Co-morbid Subjects, Safety Population)

|                                          | ZyCoV-D<br>(N=709)          |                              |                               | Placebo<br>(N=740)          |                              |                               | Overall<br>(N=1449)          |                               |                                |
|------------------------------------------|-----------------------------|------------------------------|-------------------------------|-----------------------------|------------------------------|-------------------------------|------------------------------|-------------------------------|--------------------------------|
|                                          | Dose I<br>(N1=709)<br>n(%)E | Dose II<br>(N1=688)<br>n(%)E | Dose III<br>(N1=658)<br>n(%)E | Dose I<br>(N2=740)<br>n(%)E | Dose II<br>(N2=713)<br>n(%)E | Dose III<br>(N2=684)<br>n(%)E | Dose I<br>(N3=1449)<br>n(%)E | Dose II<br>(N3=1401)<br>n(%)E | Dose III<br>(N3=1342)<br>n(%)E |
| <b>Solicited Local Adverse Events</b>    |                             |                              |                               |                             |                              |                               |                              |                               |                                |
| Pain injection site                      | 6(0.85) 6                   | -                            | 1(0.15) 1                     | 13(1.76) 13                 | 1(0.14) 1                    | 1(0.15) 1                     | 19(1.31) 19                  | 1(0.07) 1                     | 2(0.15) 2                      |
| Mild                                     | 6(100) 6                    | -                            | 1(100) 1                      | 13(100) 13                  | 1(100) 1                     | 1(100) 1                      | 19(100) 19                   | 1(100) 1                      | 2(100) 2                       |
| Redness                                  | 2(0.28) 2                   | 1(0.15) 1                    | 1(0.15) 1                     | 5(0.68) 5                   | -                            | -                             | 7(0.48) 7                    | 1(0.07) 1                     | 1(0.07) 1                      |
| Mild                                     | 2(100) 2                    | 1(100) 1                     | 1(100) 1                      | 5(100) 5                    | -                            | -                             | 7(100) 7                     | 1(100) 1                      | 1(100) 1                       |
| Swelling                                 | 3(0.42) 3                   | -                            | -                             | 10(1.35) 10                 | -                            | -                             | 13(0.90) 13                  | -                             | -                              |
| Mild                                     | 3(100) 3                    | -                            | -                             | 10(100) 10                  | -                            | -                             | 13(100) 13                   | -                             | -                              |
| Itching                                  | -                           | -                            | -                             | 3(0.41) 3                   | 1(0.14) 1                    | -                             | 3(0.21) 3                    | 1(0.07) 1                     | -                              |
| Mild                                     | -                           | -                            | -                             | 3(100) 3                    | 1(100) 1                     | -                             | 3(100) 3                     | 1(100) 1                      | -                              |
| <b>Solicited Systemic Adverse Events</b> |                             |                              |                               |                             |                              |                               |                              |                               |                                |
| Diarrhoea                                | 1(0.14) 1                   | -                            | -                             | 1(0.14) 1                   | 1(0.14) 1                    | -                             | 2(0.14) 2                    | 1(0.07) 1                     | -                              |
| Mild                                     | -                           | -                            | -                             | 1(100) 1                    | -                            | -                             | 1(50.00) 1                   | -                             | -                              |
| Moderate                                 | 1(100) 1                    | -                            | -                             | -                           | 1(100) 1                     | -                             | 1(50.00) 1                   | 1(100) 1                      | -                              |
| Arthralgia                               | -                           | -                            | 1(0.15) 1                     | 1(0.14) 1                   | -                            | -                             | 1(0.07) 1                    | -                             | 1(0.07) 1                      |
| Mild                                     | -                           | -                            | 1(100) 1                      | 1(100) 1                    | -                            | -                             | 1(100) 1                     | -                             | 1(100) 1                       |
| Muscle Pain                              | 3(0.42) 3                   | -                            | 1(0.15) 1                     | 10(1.35) 10                 | -                            | 3(0.44) 3                     | 13(0.90) 13                  | -                             | 4(0.30) 4                      |
| Mild                                     | 3(100) 3                    | -                            | 1(100) 1                      | 9(90.00) 9                  | -                            | 3(100) 3                      | 12(92.31) 12                 | -                             | 4(100) 4                       |
| Moderate                                 | -                           | -                            | -                             | 1(10.00) 1                  | -                            | -                             | 1(7.69) 1                    | -                             | -                              |
| Headache                                 | 2(0.28) 2                   | 1(0.15) 1                    | 3(0.46) 3                     | 3(0.41) 3                   | 2(0.28) 2                    | 1(0.15) 1                     | 5(0.35) 5                    | 3(0.21) 3                     | 4(0.30) 4                      |
| Mild                                     | 2(100) 2                    | 1(100) 1                     | 3(100) 3                      | 3(100) 3                    | 2(100) 2                     | 1(100) 1                      | 5(100) 5                     | 3(100) 3                      | 4(100) 4                       |
| Nausea                                   | -                           | -                            | -                             | -                           | -                            | -                             | -                            | -                             | -                              |

|          | ZyCoV-D<br>(N=709)          |                              |                               | Placebo<br>(N=740)          |                              |                               | Overall<br>(N=1449)          |                               |                                |
|----------|-----------------------------|------------------------------|-------------------------------|-----------------------------|------------------------------|-------------------------------|------------------------------|-------------------------------|--------------------------------|
|          | Dose I<br>(N1=709)<br>n(%)E | Dose II<br>(N1=688)<br>n(%)E | Dose III<br>(N1=658)<br>n(%)E | Dose I<br>(N2=740)<br>n(%)E | Dose II<br>(N2=713)<br>n(%)E | Dose III<br>(N2=684)<br>n(%)E | Dose I<br>(N3=1449)<br>n(%)E | Dose II<br>(N3=1401)<br>n(%)E | Dose III<br>(N3=1342)<br>n(%)E |
| Malaise  | -                           | -                            | -                             | -                           | -                            | -                             | -                            | -                             | -                              |
| Fatigue  | 1(0.14) 1                   | 1(0.15) 1                    | -                             | 1(0.14) 1                   | 4(0.56) 4                    | -                             | 2(0.14) 2                    | 5(0.36) 5                     | -                              |
| Mild     | 1(100) 1                    | -                            |                               | 1(100) 1                    | 3(75.00) 3                   | -                             | 2(100) 2                     | 3(60.00) 3                    | -                              |
| Moderate | -                           | 1(100) 1                     | -                             | -                           | 1(25.00) 1                   | -                             | -                            | 2(40.00) 2                    | -                              |
| Fever    | 2(0.28) 2                   | -                            | 2(0.30) 2                     | 3(0.41) 3                   | 4(0.56) 4                    | 2(0.29) 2                     | 5(0.35) 5                    | 4(0.29) 4                     | 4(0.30) 4                      |
| Mild     | 2(100) 2                    | -                            | 2(100) 2                      | 3(100) 3                    | 4(100) 4                     | 2(100) 2                      | 5(100) 5                     | 4(100) 4                      | 4(100) 4                       |

N = number of Subjects at risk; n=number Subjects with AE; E = number of AE.  
-N1=Number of Subject at dose I. N2=Number of Subject at dose II. N3=Number of Subject at dose III.
